# Supplementary material for: Hospital market concentration and the use of mechanical circulatory support devices in acute myocardial infarction complicated by cardiogenic shock
Source: Springer Nature journal article supplement (doi:10.1186/s12913-021-07458-1), 2022-01-19

**SUPPLEMENTAL MATERIAL**

“Hospital Market Concentration and the Use of Mechanical Circulatory Support Devices in Acute Myocardial Infarction Complicated by Cardiogenic Shock”

**Figure S1: Herfindahl-Hirschman Index. (A) Definition of HHI.** HHI is defined as the square of sum of market shares of all hospitals in a market. **(B) Defining Hospital Radius.** A hospital's market can be defined as either a fixed or variable radius. Fixed radius evaluates all hospitals within a certain distance of the hospital. Variable radius evaluates a distance that encompasses a percentage of a hospital's discharges.

**A**

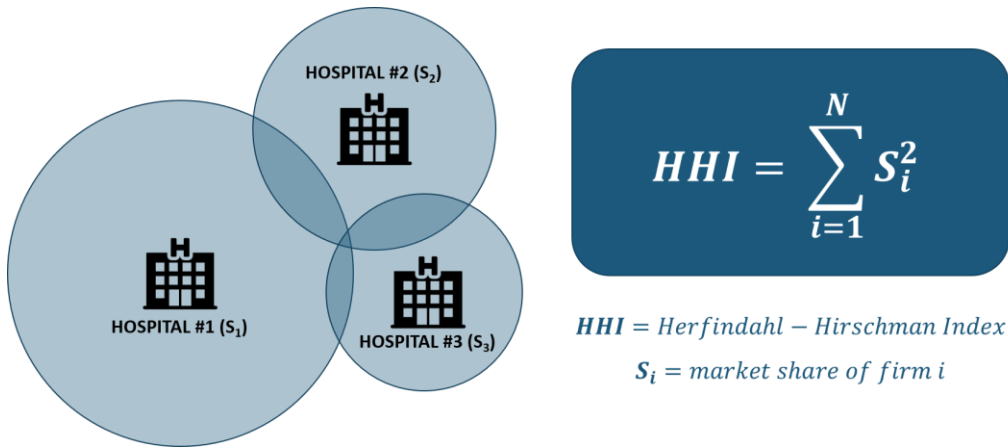

**B**

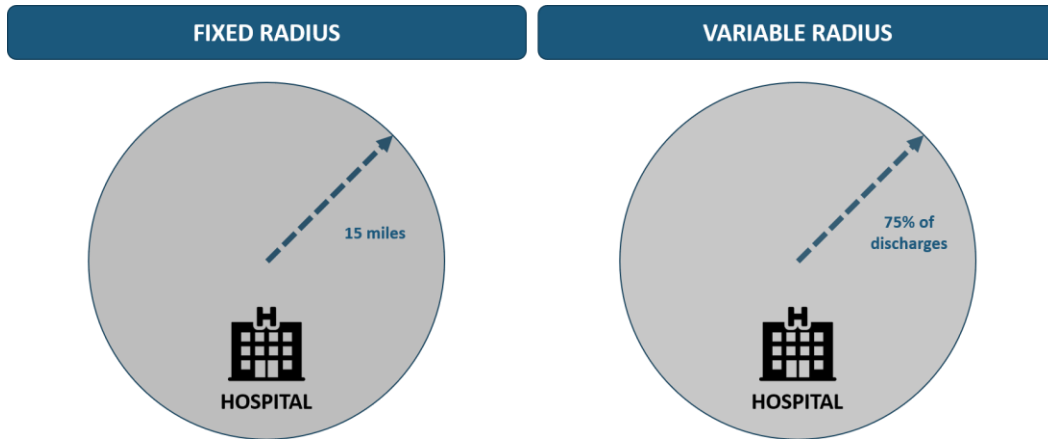

**Table S1: Administrative Codes Used to Define Variables**

| Variable Name                                   | ICD-9-CM Code                                                                                                                                                                                                                                                                                                |
|-------------------------------------------------|--------------------------------------------------------------------------------------------------------------------------------------------------------------------------------------------------------------------------------------------------------------------------------------------------------------|
| Percutaneous devices                            | 37.68                                                                                                                                                                                                                                                                                                        |
| Non-percutaneous devices                        | 37.60, 36.65                                                                                                                                                                                                                                                                                                 |
| IABP                                            | 37.61                                                                                                                                                                                                                                                                                                        |
| ECMO                                            | 39.65, 39.66                                                                                                                                                                                                                                                                                                 |
| Coronary angiography                            | 37.22, 37.23, 88.52, 88.53, 88.54, 88.55, 88.56, 88.57                                                                                                                                                                                                                                                       |
| PCI                                             | 00.66, 17.55, 36.01, 36.02, 36.05, 36.06, 36.07                                                                                                                                                                                                                                                              |
| CABG                                            | 36.10-36.17, 36.19                                                                                                                                                                                                                                                                                           |
| Right heart catheterization                     | 37.21                                                                                                                                                                                                                                                                                                        |
| Congestive heart failure                        | 398.91, 402.01, 402.11, 402.91, 404.01, 404.03, 404.11, 404.13, 404.91, 404.93, 428.0- 428.9                                                                                                                                                                                                                 |
| Valvular disease                                | 093.20- 093.24, 394.0- 397.1, 397.9, 424.0- 424.99, 746.3- 746.6, V42.2, V43.3                                                                                                                                                                                                                               |
| Pulmonary circulation disorders                 | 415.0, 415.11- 415.19, 416.0- 416.9, 417.0-417.9                                                                                                                                                                                                                                                             |
| Peripheral vascular disorders                   | 440-440.9, 441.00- 441.9, 442.0- 442.9, 443.1- 443.9, 444.21- 444.22, 447.1,449, 557.1, 557.9, V43.4                                                                                                                                                                                                         |
| Paralysis                                       | 342.0- 344.9                                                                                                                                                                                                                                                                                                 |
| Other neurological disorders                    | 330.0- 331.9, 332.0, 333.4, 333.5, 333.71, 333.72, 333.79, 333.85, 333.94, 334.0- 335.9, 338.0, 340, 341.1- 341.9, 345.00- 345.11, 345.2- 345.3, 345.40- 345.91, 347.00- 347.01, 347.10- 347.11, 649.40- 649.44, 768.7, 768.70, 768.71, 768.72, 768.73, 780.3, 780.31, 780.32, 780.33, 780.39, 780.97, 784.3 |
| Chronic pulmonary disease                       | 490-492.8, 493.00- 493.92, 494-494.1, 495.0-505, 506.4                                                                                                                                                                                                                                                       |
| Diabetes, uncomplicated                         | 249.00- 249.31, 250.00- 250.33, 648.00- 648.04                                                                                                                                                                                                                                                               |
| Diabetes with chronic complications             | 249.40- 249.91, 250.40- 250.93, 775.1                                                                                                                                                                                                                                                                        |
| Hypothyroidism                                  | 243-244.2, 244.8, 244.9                                                                                                                                                                                                                                                                                      |
| Renal failure                                   | 403.01, 403.11, 403.90, 403.91, 404.02, 404.03, 404.12, 404.13, 404.92, 404.93, 585.3, 585.4, 585.5, 585.6, 585.9, 586, V42.0, V45.1, V45.11, V45.12, V56.0- V56.32, V56.8                                                                                                                                   |
| Liver disease                                   | 070.22, 070.23, 070.32, 070.33 , 070.44, 070.54, 456.0, 456.1, 456.20, 456.21, 571.0, 571.2, 571.3, 571.40- 571.49, 571.5, 571.6, 571.8, 571.9, 572.3, 572.8, 573.5, V42.7                                                                                                                                   |
| Peptic ulcer disease excluding bleeding         | 531.41, 531.51, 531.61, 531.70, 531.71, 531.91, 532.41, 532.51, 532.61, 532.70, 532.71, 532.91, 533.41, 533.51, 533.61, 533.70, 533.71, 533.91, 534.41, 534.51, 534.61, 534.70, 534.71, 534.91                                                                                                               |
| Acquired immune deficiency syndrome             | 042.0                                                                                                                                                                                                                                                                                                        |
| Lymphoma                                        | 200.00- 202.38, 202.50- 203.01, 203.02- 203.82, 203.8- 203.81, 238.6, 273.3                                                                                                                                                                                                                                  |
| Metastatic cancer                               | 196.0- 199.2, 209.70, 209.71, 209.72, 209.73, 209.74, 209.75, 209.79, 789.51                                                                                                                                                                                                                                 |
| Solid tumor without metastasis                  | 140.0- 172.9, 174.0- 175.9, 179-195.8, 209.00- 209.24, 209.25- 209.3, 209.30- 209.36, 258.01- 258.03                                                                                                                                                                                                         |
| Rheumatoid arthritis/collagen vascular diseases | 701.0, 710.0- 710.9, 714.0- 714.9, 720.0- 720.9, 725                                                                                                                                                                                                                                                         |
| Coagulopathy                                    | 286.0- 286.9, 287.1, 287.3- 287.5, 289.84, 649.30- 649.34                                                                                                                                                                                                                                                    |
| Obesity                                         | 278.0, 278.00, 278.01, 278.03, 649.10- 649.14, 793.91, V85.30- V85.39, V85.41- V85.45, V85.54                                                                                                                                                                                                                |
| Weight loss                                     | 260-263.9, 783.21, 783.22                                                                                                                                                                                                                                                                                    |
| Fluid and electrolyte disorders                 | 276.0- 276.9                                                                                                                                                                                                                                                                                                 |
| Chronic blood loss anemia                       | 280.0, 648.20- 648.24                                                                                                                                                                                                                                                                                        |
| Deficiency anemias                              | 280.1- 281.9, 285.21- 285.29, 285.9                                                                                                                                                                                                                                                                          |
| Alcohol abuse                                   | 291.0- 291.3, 291.5, 291.8, 291.81, 291.82, 291.89, 291.9, 303.00- 303.93, 305.00- 305.03                                                                                                                                                                                                                    |
| Drug abuse                                      | 292.0, 292.82- 292.89, 292.9, 304.00- 304.93, 305.20- 305.93, 648.30- 648.34                                                                                                                                                                                                                                 |
| Psychoses                                       | 295.00- 298.9, 299.10, 299.11                                                                                                                                                                                                                                                                                |
| Depression                                      | 300.4, 301.12, 309.0, 309.1, 311                                                                                                                                                                                                                                                                             |
| Hypertension, complicated and uncomplicated     | 401.1, 401.9, 642.00- 642.04                                                                                                                                                                                                                                                                                 |

**Table S2: Multivariable Logistic Mixed Effects Model, Patient Characteristics (2003 – 2009)**

| Variable                                             | Odds Ratio | Confidence interval | p-value |
|------------------------------------------------------|------------|---------------------|---------|
| <b>Age</b>                                           | 0.98       | 0.98 – 0.99         | <0.01   |
| <b>Female</b>                                        | 0.76       | 0.72 – 0.80         | <0.01   |
| <b>Race</b>                                          |            |                     |         |
| <i>White (reference)</i>                             | REF        | REF                 | REF     |
| <i>Black</i>                                         | 0.79       | 0.69 – 0.89         | <0.01   |
| <i>Hispanic</i>                                      | 0.98       | 0.87 – 1.10         | 0.77    |
| <i>Asian or Pacific Islander</i>                     | 1.18       | 0.98 – 1.41         | 0.08    |
| <i>Native American</i>                               | 1.04       | 0.71 – 1.51         | 0.85    |
| <i>Other / Unknown</i>                               | 1.06       | 0.98 – 1.15         | 0.14    |
| <b>Comorbid Conditions</b>                           |            |                     |         |
| <i>Congestive heart failure</i>                      | 1.25       | 1.19 – 1.33         | <0.01   |
| <i>Valvular disease</i>                              | 1.14       | 1.07 – 1.22         | <0.01   |
| <i>Pulmonary circulation disorders</i>               | 1.0        | 0.88 – 1.13         | 0.99    |
| <i>Peripheral vascular disease</i>                   | 0.70       | 0.64 – 0.76         | <0.01   |
| <i>Paralysis</i>                                     | 0.84       | 0.63 – 1.12         | 0.24    |
| <i>Neurologic disease</i>                            | 0.74       | 0.65 – 0.83         | <0.01   |
| <i>Chronic obstructive pulmonary disease</i>         | 0.76       | 0.71 – 0.81         | <0.01   |
| <i>Diabetes mellitus, uncomplicated</i>              | 1.09       | 1.02 – 1.17         | <0.01   |
| <i>Diabetes mellitus, with chronic complications</i> | 0.94       | 0.82 – 1.06         | 0.30    |
| <i>Hypothyroidism</i>                                | 0.98       | 0.86 – 1.10         | 0.69    |
| <i>Chronic kidney disease</i>                        | 0.83       | 0.77 – 0.90         | <0.01   |
| <i>Liver disease</i>                                 | 0.76       | 0.59 – 0.98         | 0.03    |
| <i>Peptic ulcer disease</i>                          | 0.00       | 0.00 - NA           | 0.94    |
| <i>Acquired immune deficiency syndrome</i>           | 0.76       | 0.38 – 1.53         | 0.44    |
| <i>Lymphoma</i>                                      | 0.65       | 0.45 – 0.94         | 0.02    |
| <i>Solid tumor without metastasis</i>                | 0.92       | 0.76 – 1.12         | 0.41    |
| <i>Metastatic cancer</i>                             | 0.74       | 0.54 – 1.00         | 0.05    |
| <i>\Collagen vascular disease</i>                    | 0.81       | 0.65 – 1.01         | 0.07    |
| <i>Coagulopathy</i>                                  | 1.44       | 1.31 – 1.57         | <0.01   |
| <i>Obesity</i>                                       | 1.05       | 0.93 – 1.18         | 0.44    |
| <i>Weight loss</i>                                   | 0.97       | 0.86 – 1.10         | 0.65    |
| <i>Fluid and electrolyte disorders</i>               | 1.09       | 1.03 – 1.15         | <0.01   |
| <i>Chronic blood loss anemia</i>                     | 0.92       | 0.75 – 1.12         | 0.42    |
| <i>Deficiency anemia</i>                             | 0.95       | 0.88 – 1.03         | 0.24    |
| <i>Alcohol abuse</i>                                 | 0.86       | 0.74 – 1.00         | 0.05    |
| <i>Drug abuse</i>                                    | 0.83       | 0.66 – 1.05         | 0.12    |
| <i>Psychoses</i>                                     | 0.94       | 0.74 – 1.16         | 0.50    |
| <i>Depression</i>                                    | 0.84       | 0.71 – 0.99         | 0.04    |
| <i>Hypertension</i>                                  | 0.88       | 0.83 – 0.93         | <0.01   |

**Table S3: Multivariable Logistic Mixed Effects Model, Admission and Hospital Characteristics (2003 – 2009)**

| Variable                                               | Odds Ratio | Confidence interval | p-value |
|--------------------------------------------------------|------------|---------------------|---------|
| <b>Admission Type</b>                                  |            |                     |         |
| <i>Emergency (reference)</i>                           | REF        | REF                 | REF     |
| <i>Urgent</i>                                          | 1.01       | 0.94 – 1.09         | 0.78    |
| <i>Elective</i>                                        | 1.19       | 1.07 – 1.32         | <0.01   |
| <i>Trauma Center</i>                                   | 0.81       | 0.41 – 1.60         | 0.55    |
| <i>Other / Unknown</i>                                 | 1.06       | 0.92 – 1.22         | 0.45    |
| <b>Weekend Admission</b>                               | 0.98       | 0.92 – 1.04         | 0.49    |
| <b>Hospital Bedsize</b>                                |            |                     |         |
| <i>Small (reference)</i>                               | REF        | REF                 | REF     |
| <i>Medium</i>                                          | 0.98       | 0.82 – 1.16         | 0.79    |
| <i>Large</i>                                           | 1.04       | 0.89 – 1.23         | 0.61    |
| <b>Hospital Control</b>                                |            |                     |         |
| <i>Government or private, collapsed (reference)</i>    | REF        | REF                 | REF     |
| <i>Government, nonfederal, public</i>                  | 0.88       | 0.68 – 1.13         | 0.31    |
| <i>Private, non-profit, voluntary</i>                  | 0.87       | 0.74 – 1.02         | 0.08    |
| <i>Private, invest-own</i>                             | 0.99       | 0.83 – 1.17         | 0.87    |
| <i>Private, collapsed</i>                              | 0.96       | 0.66 – 1.39         | 0.83    |
| <b>Teaching Hospital</b>                               | 0.93       | 0.81 – 1.06         | 0.28    |
| <b>Urban</b>                                           | 0.96       | 0.74 – 1.24         | 0.77    |
| <b>Procedures</b>                                      |            |                     |         |
| <i>Left heart catherization</i>                        | 5.07       | 4.74 – 5.43         | <0.01   |
| <i>Percutaneous coronary intervention</i>              | 2.62       | 2.46 – 2.79         | <0.01   |
| <i>Coronary artery bypass graft</i>                    | 4.34       | 4.03 – 4.68         | <0.01   |
| <b>Herfindal-Hirschman Index (variable radius 75%)</b> | 0.91       | 0.76 – 1.10         | 0.34    |

**Figure S2: Mechanical Circulatory Support by Year (2003 – 2009).** Mechanical circulatory support utilization has increased over the study time period including substantial increase in percutaneous devices and extracorporeal membrane oxygenations. The rise in percutaneous devices, such as Impella, has been most prominent in competitive markets.

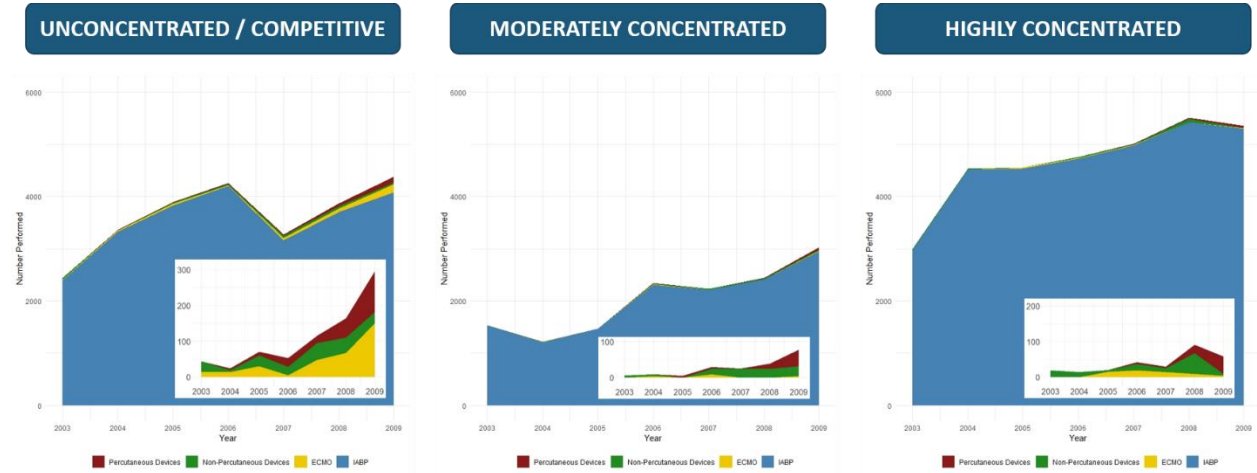

Supplement: MOESM1 [file 20048954]
